# Supplementary material for: Phylogeny of Amazona barbadensis and the Yellow-Headed Amazon Complex (Aves: Psittacidae): A New Look at South American Parrot Evolution
Source: PLoS One. 2014 May 13;9(5):e97228. doi: 10.1371/journal.pone.0097228 (PMC4019560; doi:10.1371/journal.pone.0097228)
Supplement: Table S2 — List of taxa and sequences included in the 12s+16s+cox3 data set. Length - the length of the whole combined mitochondrial sequence. (XLSX) [file pone.0097228.s004.xlsx]

## Sheet: Arkusz1
		TAXON	12S		16S		COX1		Length
			GenBank	bp	GenBank	bp	GenBank	bp
		Amazona barbadensis	JX524615	390	JX524615	535	JX524615	561	1486
		Amazona aestiva aestiva *	AY301328	390	AY301376	533	AY301424	561	1484
		Amazona aestiva xanthopteryx *	AY301329	390	AY301377	533	AY301425	561	1484
		Amazona ochrocephala ochrocephala *	AY301355	390	AY301403	535	AY301451	561	1486
		Amazona ochrocephala xantholaema *	AY301357	390	AY301405	533	AY301453	561	1484
		Amazona ochrocephala nattereri *	AY301354	390	AY301402	532	AY301450	561	1483
		Amazona ochrocephala panamensis *	AY301356	390	AY301404	534	AY301452	561	1485
		Amazona auropalliata parvipes *	AY301337	390	AY301385	534	AY301433	561	1485
		Amazona auropalliata auropalliata *	AY301336	390	AY301384	534	AY301432	561	1485
		Amazona oratrix oratrix *	AY301360	390	AY301408	534	AY301456	561	1485
		Amazona oratrix belizensis *	AY301358	390	AY301406	534	AY301454	561	1485
		Amazona oratrix homdurensis *	AY301359	390	AY301407	534	AY301455	561	1485
		Amazona agilis	AY301330	390	AY301378	534	AY301426	561	1485
		Amazona albifrons albifrons	AY301331	390	AY301379	534	AY301427	561	1485
		Amazona albifrons nana	AY301332	390	AY301380	533	AY301428	561	1484
		Amazona albifrons saltuensis	AY301333	390	AY301381	535	AY301429	561	1486
		Amazona amazonica	AY301334	391	AY301382	533	AY301430	561	1485
		Amazona arausiaca	AY301335	390	AY301383	534	AY301431	561	1485
		Amazona autumnalis	AY301338	390	AY301386	531	AY301434	561	1482
		Amazona autumnalis lilacine	AY301339	390	AY301387	532	AY301435	561	1483
		Amazona brasiliensis	AY301341	390	AY301389	533	AY301437	561	1484
		Amazona collaria	AY301342	390	AY301390	535	AY301438	561	1486
		Amazona dufresniana	AY301343	390	AY301391	536	AY301439	561	1487
		Amazona farinosa farinosa	AY301344	390	AY301392	534	AY301440	561	1485
		Amazona farinosa guatemale	AY301345	389	AY301393	535	AY301441	561	1485
		Amazona farinosa inornata	AY301346	390	AY301394	534	AY301442	561	1485
		Amazona farinosa virenticeps	AY301347	389	AY301395	535	AY301443	561	1485
		Amazona festiva bodini	AY301348	390	AY301396	533	AY301444	561	1484
		Amazona finschi	AY301349	390	AY301397	533	AY301445	561	1484
		Amazona guildingii	AY301350	390	AY301398	533	AY301446	561	1484
		Amazona imperialis	AY301351	390	AY301399	534	AY301447	561	1485
		Amazona kawalii	AY301352	390	AY301400	535	AY301448	561	1486
		Amazona leucocephala leucocephala	AY301353	390	AY301401	535	AY301449	561	1486
		Amazona pretrei	AY301361	390	AY301409	534	AY301457	561	1485
		Amazona rhodocorytha	AY301362	390	AY301410	534	AY301458	561	1485
		Amazona tucumana	AY301363	390	AY301411	535	AY301459	561	1486
		Amazona ventralis	AY301364	390	AY301412	534	AY301460	561	1485
		Amazona versicolor	AY301365	390	AY301413	533	AY301461	561	1484
		Amazona vinacea	AY301366	390	AY301414	535	AY301462	561	1486
		Amazona viridigenalis	AY301367	390	AY301415	533	AY301463	561	1484
		Amazona vittata	AY301368	390	AY301416	535	AY301464	561	1486
		Alipiopsitta xanthops	AY301369	390	AY301417	531	AY301465	561	1482
		Graydidascalus brachyurus	AY301372	390	AY301420	534	AY301468	561	1485
		Pionus menstruus	AY301373	390	AY301421	534	AY661226	561	1485
		Pionopsitta pileata	DQ143221	390	DQ143249	522	AY661227	561	1473
		Triclaria malachitacea	DQ143222	391	DQ143244	516	HQ629783	532	1439
		Cacatua moluccensis	JF414239	398	JF414239	551	JF414239	561	1510
