# Supplementary material for: Phylogeny of Amazona barbadensis and the Yellow-Headed Amazon Complex (Aves: Psittacidae): A New Look at South American Parrot Evolution
Source: PLoS One. 2014 May 13;9(5):e97228. doi: 10.1371/journal.pone.0097228 (PMC4019560; doi:10.1371/journal.pone.0097228)
Supplement: Table S4 — List of taxa, individuals and sequences included in the cytochrome b data set. (XLSX) [file pone.0097228.s006.xlsx]

## Sheet: Arkusz1
		Taxon	Individual	GenBank	bp
		Amazona barbadensis		JX524615	694
		Amazona aestiva aestiva	( I )	AY283497	694
		Amazona aestiva aestiva	( II )	AY283469	694
		Amazona ochrocephala ochrocephala	(1)	AY194405	694
		Amazona ochrocephala ochrocephala	(3)	AY194411	694
		Amazona ochrocephala xantholaema	(1)	AY194407	658
		Amazona ochrocephala panamensis		AY283471	694
		Amazona auropalliata auropalliata		JQ235572	664
		Amazona oratrix oratrix		AY283470	694
		Amazona oratrix belizensis	(2)	AY194406	694
		Amazona tresmariae		AY283468	694
		Amazona agilis		AY283489	694
		Amazona albifrons		AY283492	694
		Amazona amazonica		JQ235571	664
		Amazona arausiaca		AY283464	694
		Amazona autumnalis		AY283456	694
		Amazona collaria		AY283494	694
		Amazona dufresniana		AY283454	694
		Amazona farinosa farinosa		JQ235577	664
		Amazona finschi		AY283461	694
		Amazona guildingii		AY283459	694
		Amazona imperialis		AY283457	694
		Amazona kawalii		JQ235589	664
		Amazona leucocephala		AY283488	694
		Amazona ventralis		AY283474	694
		Amazona versicolor		AY283466	694
		Amazona viridigenalis		AY283452	694
		Amazona vittata		AY283491	694
		Alipiopsitta xanthops		AY669441	694
		Graydidascalus brachyurus		AY669440	694
		Pionus chalcopterus		EF517621	694
		Pionus menstruus		AY669403	694
		Pionopsitta pileata		AY669435	694
		Triclaria malachitacea		AY669442	694
		Cacatua moluccensis		JF414239	694
