# Supplementary material for: Phylogeny of Amazona barbadensis and the Yellow-Headed Amazon Complex (Aves: Psittacidae): A New Look at South American Parrot Evolution
Source: PLoS One. 2014 May 13;9(5):e97228. doi: 10.1371/journal.pone.0097228 (PMC4019560; doi:10.1371/journal.pone.0097228)
Supplement: Table S5 — List of taxa and sequences included in the 12s+16s+cox+cytb4 data set. Length - the length of the whole combined mitochondrial sequence. (XLSX) [file pone.0097228.s007.xlsx]

## Sheet: Arkusz1
		TAXON	12S		16S		COX1		CYTB		LENGHT
			GenBank	bp	GenBank	bp	GenBank	bp	GenBank	bp
		Amazona barbadensis	JX524615	390	JX524615	535	JX524615	561	JX524615	694	2180
		Amazona aestiva aestiva	AY301328	390	AY301376	533	AY301424	561	AY283497	694	2178
		Amazona ochrocephala ochrocephala	AY301355	390	AY301403	535	AY301451	561	AY194411	694	2180
		Amazona ochrocephala xantholaema	AY301357	390	AY301405	533	AY301453	561	AY194407	694	2178
		Amazona ochrocephala panamensis	AY301356	390	AY301404	534	AY301452	561	AY283471	694	2179
		Amazona auropalliata auropalliata	AY301336	390	AY301384	534	AY301432	561	JQ235572	694	2179
		Amazona oratrix oratrix	AY301360	390	AY301408	534	AY301456	561	AY283470	694	2179
		Amazona oratrix belizensis	AY301358	390	AY301406	534	AY301454	561	AY194406	694	2179
		Amazona agilis	AY301330	390	AY301378	534	AY301426	561	AY283489	694	2179
		Amazona albifrons	AY301331	390	AY301379	534	AY301427	561	AY283492	694	2179
		Amazona amazonica	AY301334	391	AY301382	533	AY301430	561	JQ235571	694	2179
		Amazona arausiaca	AY301335	390	AY301383	534	AY301431	561	AY283464	694	2179
		Amazona autumnalis	AY301338	390	AY301386	531	AY301434	561	AY283456	694	2176
		Amazona collaria	AY301342	390	AY301390	535	AY301438	561	AY283494	694	2180
		Amazona dufresniana	AY301343	390	AY301391	536	AY301439	561	AY283454	694	2181
		Amazona farinosa farinosa	AY301344	390	AY301392	534	AY301440	561	JQ235577	694	2179
		Amazona finschi	AY301349	390	AY301397	533	AY301445	561	AY283461	694	2178
		Amazona guildingii	AY301350	390	AY301398	533	AY301446	561	AY283459	694	2178
		Amazona imperialis	AY301351	390	AY301399	534	AY301447	561	AY283457	694	2179
		Amazona kawalii	AY301352	390	AY301400	535	AY301448	561	JQ235589	694	2180
		Amazona leucocephala	AY301353	390	AY301401	535	AY301449	561	AY283488	694	2180
		Amazona ventralis	AY301364	390	AY301412	534	AY301460	561	AY283474	694	2179
		Amazona versicolor	AY301365	390	AY301413	533	AY301461	561	AY283466	694	2178
		Amazona viridigenalis	AY301367	390	AY301415	533	AY301463	561	AY283452	694	2178
		Amazona vittata	AY301368	390	AY301416	535	AY301464	561	AY283491	694	2180
		Alipiopsitta xanthops	AY301369	390	AY301417	531	AY301465	561	AY669441	694	2176
		Graydidascalus brachyurus	AY301372	390	AY301420	534	AY301468	561	AY669440	694	2179
		Pionus menstruus	AY301373	390	AY301421	534	AY661226	561	AY669403	694	2179
		Pionopsitta pileata	DQ143221	390	DQ143249	522	AY661227	561	AY669435	694	2167
		Triclaria malachitacea	DQ143222	391	DQ143244	516	HQ629783	532	AY669442	694	2133
		Cacatua moluccensis	JF414239	398	JF414239	551	JF414239	561	JF414239	694	2204
